# Supplementary material for: Genome-wide survey of switchgrass NACs family provides new insights into motif and structure arrangements and reveals stress-related and tissue-specific NACs
Source: PubMed Central journal article supplement (PMC5465074; doi:10.1038/s41598-017-03435-z), 2017-06-08
Supplement: 41598_2017_3435_MOESM1_ESM.pdf [file 41598_2017_3435_MOESM1_ESM.pdf]

**Genome-wide survey of switchgrass NACs family provides new insights into motif and structure arrangements and reveals stress-related and tissue-specific NACs**

**Haidong Yan<sup>1</sup>, Ailing Zhang<sup>1</sup>, Yuntian Ye<sup>2</sup>, Bin Xu<sup>3,\*</sup>, Jing Chen<sup>1</sup>, Xiaoyan He<sup>1</sup>, Chengran Wang<sup>1</sup>, Sifan Zhou<sup>1</sup>, Xinquan Zhang<sup>1,\*</sup>, Yan Peng<sup>1</sup>, Xiao Ma<sup>1</sup>, Yanhong Yan<sup>1</sup>, Linkai Huang<sup>1,\*</sup>.**

**a****b****c**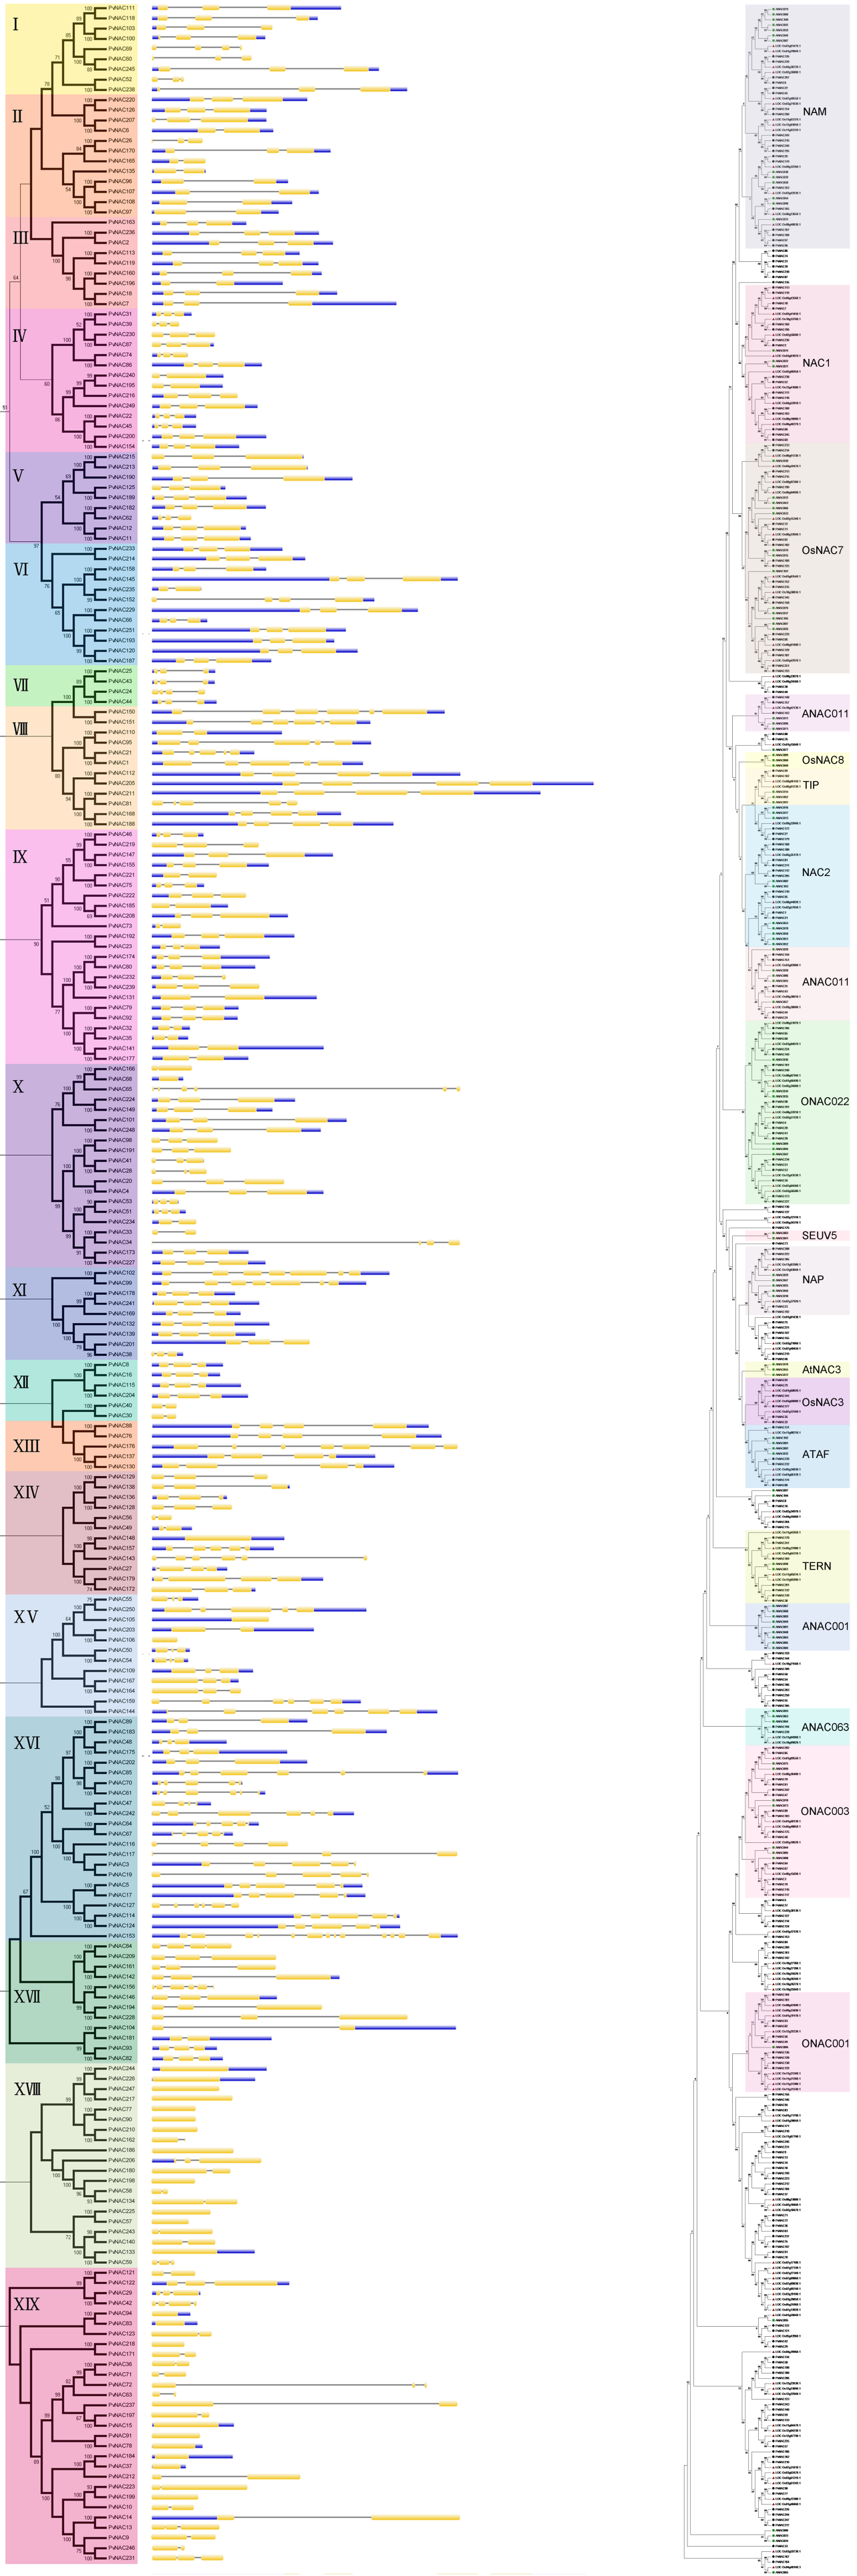

**Figure S1** Analysis of phylogenetic relationships for NAC genes. a. Multiple sequence alignment of 251 amino acids of PvNACs was conducted using ClustalX, and the phylogenetic tree was constructed via MEGA 5.0 by the Neighbor-joining method with 1000 bootstrap replicates and p-distance method. The phylogenetic tree only showed percentage bootstrap scores above 50%. A number of 19 phylogenetic subgroups were divided as I to XIX marked with different colour backgrounds. b. Exon/intron structures of *PvNACs*. Exons and introns are yellow boxes and black lines, respectively, and blue boxes indicate upstream/downstream sequence. c. Phylogenetic relationships of switchgrass, rice and *Arabidopsis* NAC proteins. We classified the NACs into 18 subgroups, and name of subgroups are followed by Ooka et al. (2003).

### **Reference**

Ooka, H. et al. Comprehensive analysis of NAC family genes in *Oryza sativa* and *Arabidopsis thaliana*. *Dna Res.* 10, 239-47 (2003).

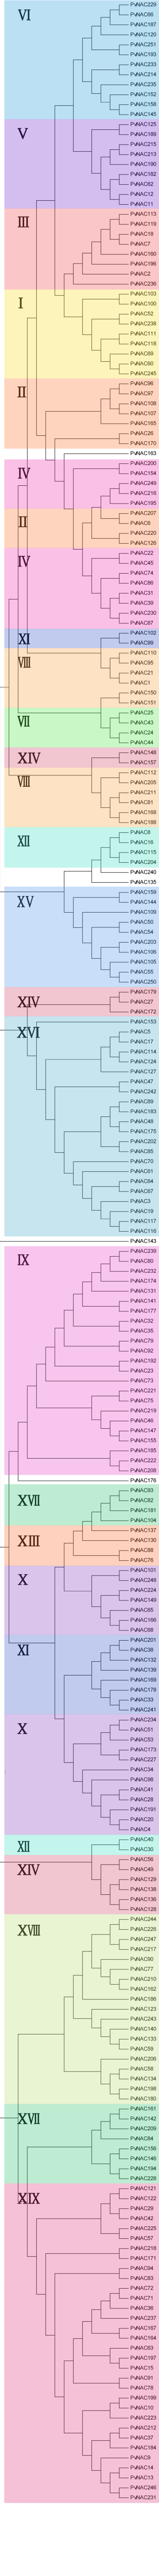



**Figure S2** Phylogenetic relationships of switchgrass NAC proteins. Multiple sequence alignment of NACs was conducted using ClustalX, and the phylogenetic tree was constructed via MEGA 5.0 by the Maximum likelihood method based on partial deletion mode. The classification of this figure was in accordance with the figure S1a.

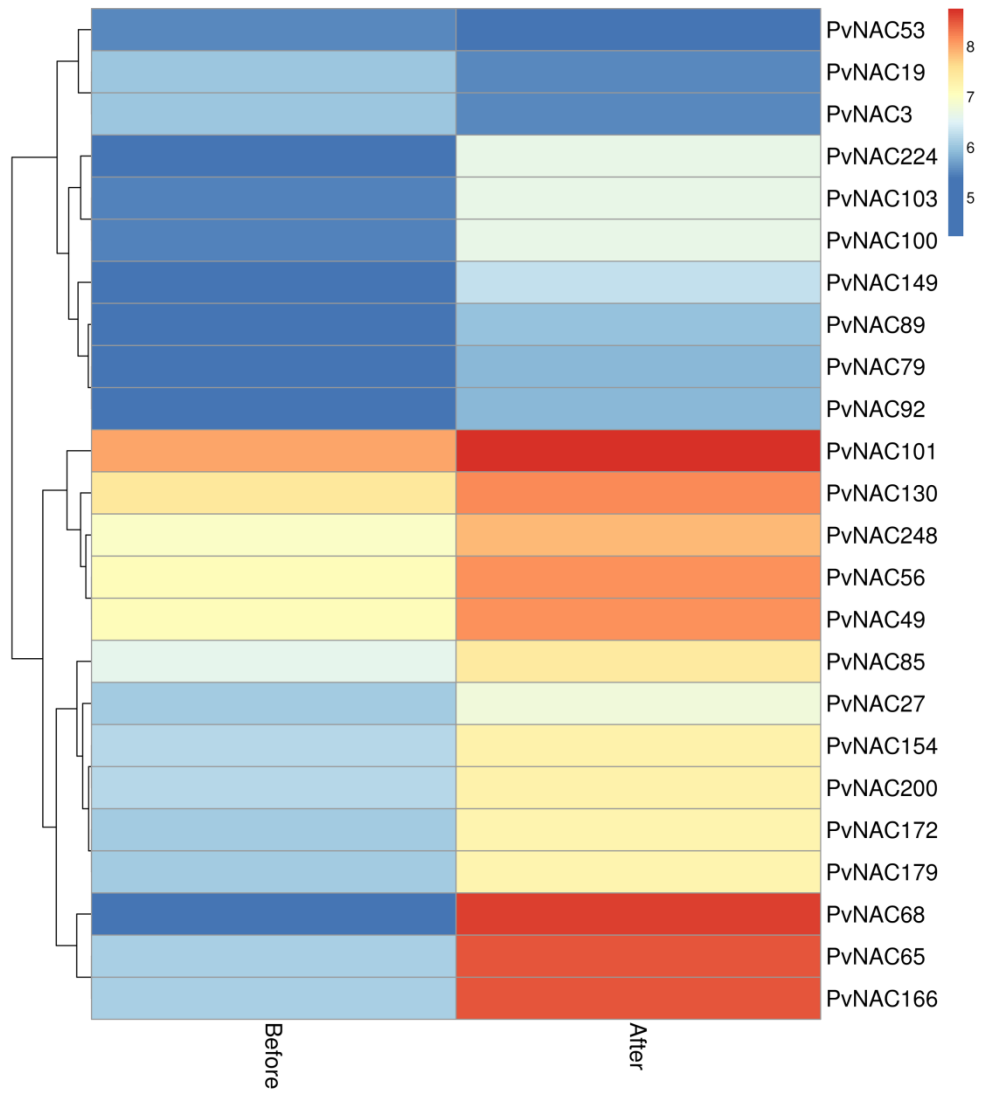

**Figure S3** The special expression profiles of 24 *PvNACs* upon heat stress as revealed by the Affymetrix data.

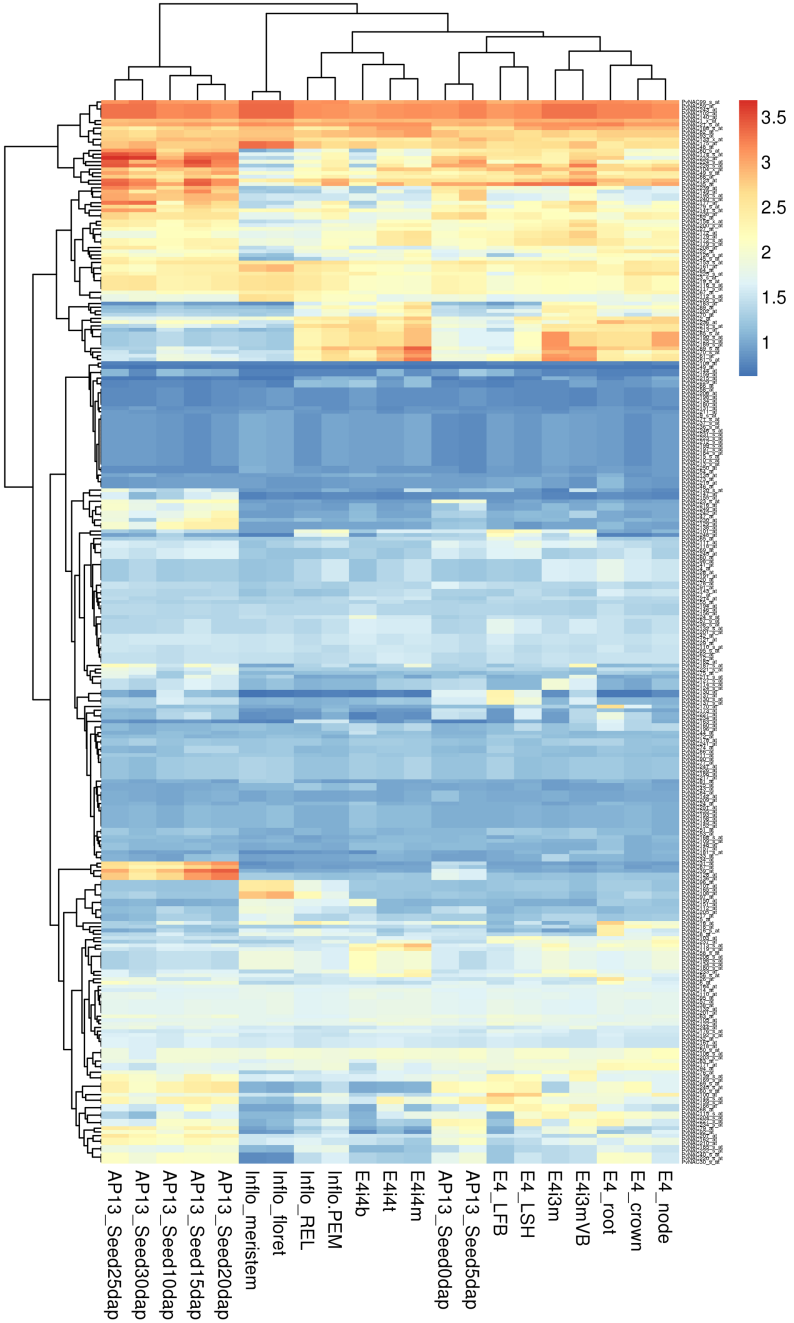

**Figure S4** Heatmap of expression profiles of *PvNACs* in 21 organs, tissues or at different developmental stages. AP13\_ Seed0d, AP13\_ Seed5d, AP13\_ Seed10d, AP13\_ Seed15d, AP13\_ Seed20d, AP13\_ Seed25d, AP13\_ Seed30d represent whole flowers at anthesis stage, whole seeds 5 days post fertilization, whole seeds with visible caryopsis, whole seeds at the milk stage, whole seeds at the soft dough stage, whole seeds at the hard dough stage, whole seeds at the physiological maturity stage, respectively. Inflo-meristem: Inflorescence meristem (0.5-3.0 mm). Inflo-floret: Floret of inflorescence when glumes are 10–20 mm. Inflo-REL: Rachis and branch elongation of inflorescence (50–150 mm). Inflo-PEM: Panicle emergence of inflorescence (>200 mm). E4-LFB: Pooled leaf blade from plant. E4-LSH: Pooled leaf sheath. E4i3m: Middle 1/5 fragment of the 3rd internode. E4i3mVB: Vascular bundle isolated from 1/5 fragment of the 3rd internode. E4i4b: Bottom 1/5 fragment of the 4th internode. E4i4t: Top 1/5 fragment of the 4th internode. E4i4m: Middle 1/5 fragment of the 4th internode 4. E4-root: Whole root system. E4-crown: Whole crown. E4-node: Pooled nodes.

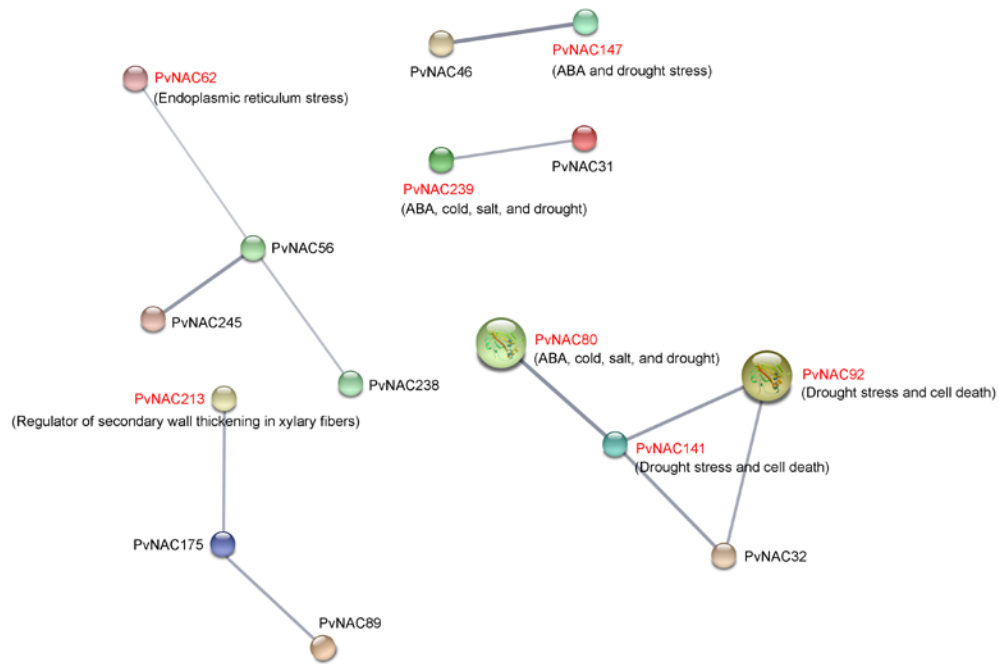

**Figure S5** Interaction network analysis of NAC proteins identified in switchgrass according to the orthologs in rice. The line thickness indicated the combined score. The PvNAC proteins with a red color indicated they are potential functional proteins in Table S1, and the predicted functional information was listed below them. This network maybe speculative because it is unknown whether the switchgrass and rice proteins are true orthologues or not, and further studies should be conducted to confirm the exact annotation.



**Figure S6** Melting curves of one reference gene (*UCE2*) and 17 *PvNAC* genes showing single peaks in qRT-PCR.

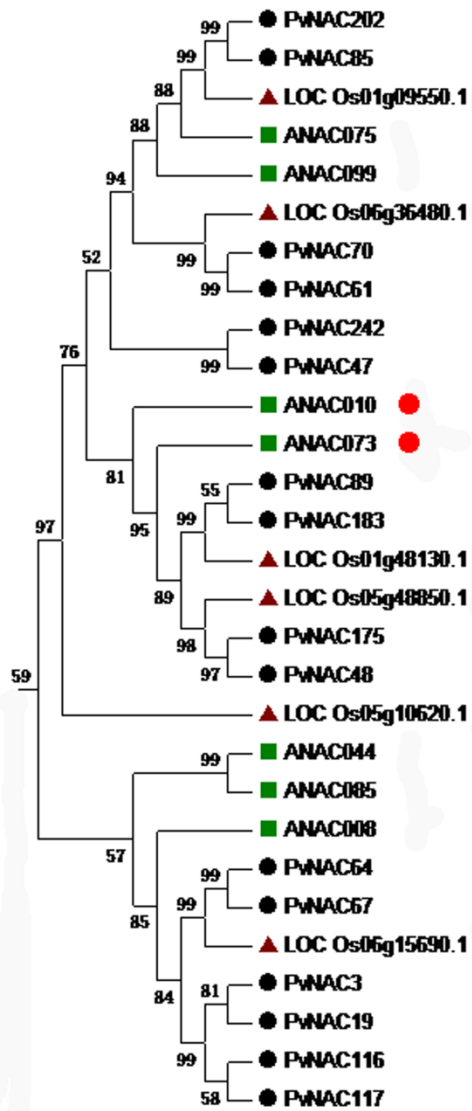

**Figure S7** The PvNACs with motif 10 in figure 8 were homologous to ANA010 and ANA073 involved in secondary cell wall thickening in lignified cells.



**a****T****A****+****B****T**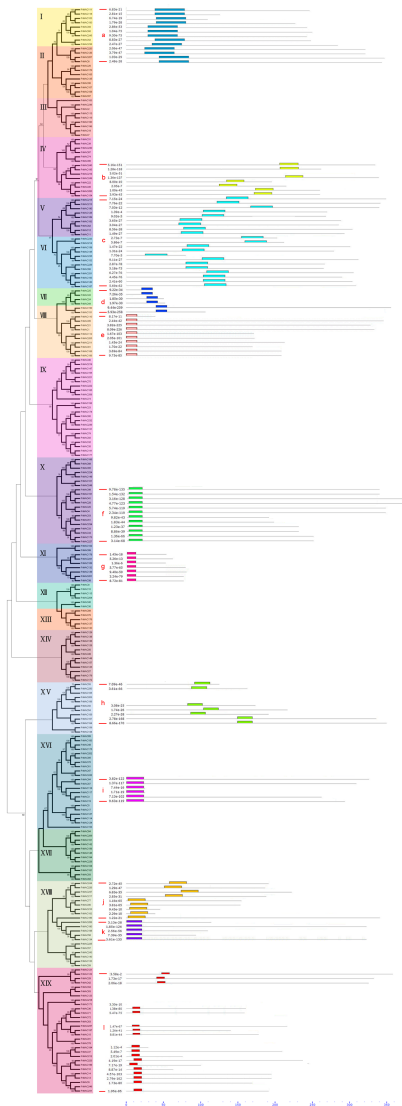**b**

Conserved motif

Motif a

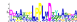

Motif b

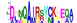

Motif c

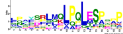

Motif d

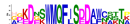

Motif e

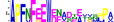

Motif f

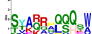

Motif g

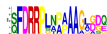

Motif h

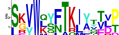

Motif i

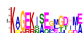

Motif j

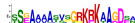

Motif k

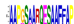

Motif l

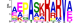

**Figure S8** Schematic representation of the C-terminal of PvNACs located TARs (or TRRs) with highly divergent sequences by MEME analysis. a. A total of 12 motifs (a-l) were identified in the TARs. b. The logo of motifs a-l in C-terminal regions.

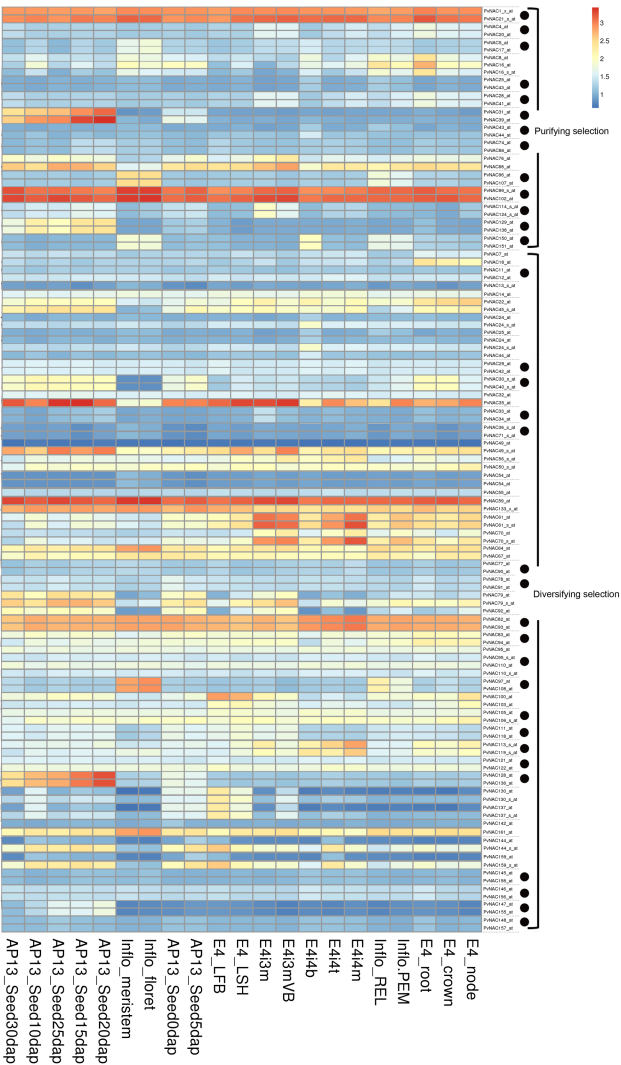

**Figure S9** The tissue level expression between paralogous *PvNAC* pairs under diversifying and purifying selection. The abbreviations of each tissue and developmental stage were derived from PviGEA database. AP13\_ Seed0d, AP13\_ Seed5d, AP13\_ Seed10d, AP13\_ Seed15d, AP13\_ Seed20d, AP13\_ Seed25d, AP13\_ Seed30d represent whole flowers at anthesis stage, whole seeds 5 days post fertilization, whole seeds with visible caryopsis, whole seeds at the milk stage, whole seeds at the soft dough stage, whole seeds at the hard dough stage, whole seeds at the physiological maturity stage, respectively. Inflo-meristem: Inflorescence meristem (0.5-3.0 mm). Inflo-floret: Floret of inflorescence when glumes are 10–20 mm. Inflo-REL: Rachis and branch elongation of inflorescence (50–150 mm). Inflo-PEM: Panicle emergence of inflorescence (>200 mm). E4-LFB: Pooled leaf blade from plant. E4-LSH: Pooled leaf sheath. E4i3m: Middle 1/5 fragment of the 3rd internode. E4i3mVB: Vascular bundle isolated from 1/5 fragment of the 3rd internode. E4i4b: Bottom 1/5 fragment of the 4th internode. E4i4t: Top 1/5 fragment of the 4th internode. E4i4m: Middle 1/5 fragment of the 4th internode 4. E4-root: Whole root system. E4-crown: Whole crown. E4-node: Pooled nodes.

**Table S1** Plant functional-annotated NAC genes and corresponding orthologs of PvNACs.

| Locus name   | NAC name           | Gene functional annotation                                                                                                 | References                                              | Closest PvNAC homolog(s)         |
|--------------|--------------------|----------------------------------------------------------------------------------------------------------------------------|---------------------------------------------------------|----------------------------------|
| Os04g38720.1 | OMTN2;<br>OsNAC2   | Regulator of the plant height and flowering time; Improve plant structure for higher light-use efficiency and higher yield | Chen et al. 2015 [1]; Mao et al. 2007 [2]               | PvNAC126/220 in clade I          |
| Os11g03370.1 | ONAC45             | Involved in drought and salt regulation                                                                                    | Zheng et al. 2009 [3]                                   | PvNAC249/216/240/195 in clade II |
| AT1G32770    | ANAC012            | Regulator of secondary wall thickening in xylary fibers                                                                    | Jae-Heung et al. 2007 [4]                               | PvNAC190/213/215 in clade III    |
| Os03g02800.1 | ONAC054/RIM1       | Component of jasmonic acid (JA) signaling                                                                                  | Yoshii et al. 2009 [5]                                  | PvNAC150/151 in clade IV         |
| Os01g60020.1 | OsNAC4;<br>ONAC068 | Be related to plant hypersensitive cell death                                                                              | Takashi et al. 2009 [6]                                 | PvNAC92/79/141/177 in clade V    |
| Os03g60080.1 | OsNAC9;<br>OsNAC19 | Involved in drought stress regulation                                                                                      | Khandok et al. 2014 [7]                                 | PvNAC92/79/141/177 in clade V    |
| Os05g34830.1 | OsNAC52            | Involved in ABA and drought stress regulation                                                                              | Gao et al. 2010 [8]                                     | PvNAC239/232/174/80 in clade V   |
| AT5G63790    | ANAC102            | Involved in ABA regulation; An important regulator of seed germination under flooding.                                     | Takasaki et al. 2015 [9]; Christianson et al. 2009 [10] | PvNAC239/232/174/80 in clade V   |
| AT5G08790    | ANAC081            | Involved in ABA regulation                                                                                                 | Takasaki et al. 2015 [9]                                | PvNAC239/232/174/80 in clade V   |
| AT1G01720    | ANAC002            | Involved in ABA regulation                                                                                                 | Takasaki et al. 2015 [9]                                | PvNAC239/232/174/80 in clade V   |
| AT1G77450    | ANAC032            | Involved in ABA regulation                                                                                                 | Takasaki et al. 2015 [9]                                | PvNAC239/232/174/80 in clade V   |
| Os01g66120.1 | OsNAC6; SNAC2      | Involved cold and salt stress regulation                                                                                   | Kazuo et al. 2007 [11]; Hu et al.                       | PvNAC239/232/174/80 in           |

|              |                     |                                                                                                                                                                             |                                                            |                                           |
|--------------|---------------------|-----------------------------------------------------------------------------------------------------------------------------------------------------------------------------|------------------------------------------------------------|-------------------------------------------|
| Os11g03300.1 | OsNAC10;<br>ONAC122 | Involved in drought regulation                                                                                                                                              | 2008 [12]<br>Sun et al. 2010 [13]; Jin et al.<br>2010 [14] | clade V<br>PvNAC208/222/185 in clade<br>V |
| Os12g03040.1 | ONAC131             | Involved in cold and drought regulation                                                                                                                                     | Sun et al. 2010 [13]                                       | PvNAC208/222/185 in clade<br>V            |
| Os07g48450.1 | NAC8                | Involved in ABA and drought stress regulation                                                                                                                               | Nuruzzaman et al. 2012 [15]                                | PvNAC75/221/147/155/219/<br>46 in clade V |
| AT2G17040    | ANAC036             | Involved in the growth of leaf cells.                                                                                                                                       | Kato et al. 2010 [16]                                      | PvNAC166/65/68/224/149<br>in clade VI     |
| Os08g33910.1 | ONAC063             | Play an important role in eliciting responses to high-salinity stress                                                                                                       | Yokotani et al. 2009 [17]                                  | PvNAC98/191/4/20/41/28 in<br>clade VI     |
| AT3G49530    | ANAC062             | Involved in endoplasmic reticulum (ER) stress signaling from the plasma membrane to the nucleus and play an important role in regulating UPR downstream gene expression     | Yang et al. 2014 [18]                                      | PvNAC99/102 in clade VII                  |
| AT4G17980    | ANAC071             | Be related to ethylene and JA                                                                                                                                               | Asahina et al. 2011 [5]                                    | PvNAC148/157/143 in clade<br>IX           |
| AT1G34190    | ANAC017             | Play a key role in both biogenic and operational mitochondrial retrograde signalling, and improve plant performance when mitochondrial function is constitutively impaired. | Aken et al. 2016 [19]                                      | PvNAC172/27/179 in clade<br>IX            |
| AT1G32870    | ANAC013             | Regulator of mitochondrial retrograde regulation (MRR) upon stress.                                                                                                         | Clercq et al. 2013 [20]                                    | PvNAC172/27/179 in clade<br>IX            |

|           |         |                                                                                                                                |                                                    |                         |
|-----------|---------|--------------------------------------------------------------------------------------------------------------------------------|----------------------------------------------------|-------------------------|
| AT4G29230 | ANAC075 | Involved in flowering-time gene regulation in phloem and/or vascular tissue formation                                          | Fujiwara et al. 2016 [21]                          | PvNAC202/85 in clade XI |
| AT2G43000 | ANAC042 | Key transcription factor involved in previously unknown regulatory mechanisms to induce phytoalexin biosynthesis               | Saga et al. 2012 [22]                              | None                    |
| AT5G39610 | ANAC092 | transcription factor incorporating the environmental and endogenous stimuli into the process of plant lateral root development | He et al. 2005 [23]                                | None                    |
| AT1G52890 | ANAC019 | Involved in JA and ABA regulation                                                                                              | Qingyun et al. 2008 [24]; Jensen et al. 2010 [25]  | None                    |
| AT3G15500 | ANAC055 | Involved in JA and ABA regulation                                                                                              | Qingyun et al. 2008 [24]; Takasaki et al. 2015 [9] | None                    |
| AT4G27410 | ANAC072 | Involved in drought, high salinity, and ABA regulation                                                                         | Takasaki et al. 2015 [9]                           | None                    |

## Reference

1. Chen, X. *et al.* OsNAC2 encoding a NAC transcription factor that affects plant height through mediating the gibberellic acid pathway in rice. *Plant J Cell Mol Biol.* **82**, 302–14 (2015).
2. Mao, C.Z. *et al.* Overexpression of a NAC - domain protein promotes shoot branching in rice. *New Phytol.* **176**, 288–98 (2007).
3. Zheng, X.N., Bo, C., Lu, G.J. & Han, B. Overexpression of a NAC transcription factor enhances rice drought and salt tolerance. *Biochem Biophys Res Commun.* **379**, 985-9 (2009).
4. Jae - Heung, K., Yang, S.H., Park, A.H., Olivier, L. & Han, K.H. ANAC012, a member of the plant-specific NAC transcription factor family, negatively regulates xylary fiber development in *Arabidopsis thaliana*. *Plant J.* **50**, 1035-48 (2007).
5. Asahina, M. *et al.* Spatially selective hormonal control of RAP2.6L and ANAC071 transcription factors involved in tissue reunion in *Arabidopsis*. *PNAS.* **108**, 16128-32 (2011).
6. Kaneda, T. *et al.* The transcription factor OsNAC4 is a key positive regulator of plant hypersensitive cell death. *Embo J.* **28**, 926-36 (2009).
7. Songyikhangsuthor, K. *et al.* Natural variation in the sequence of SNAC1 and its expression level polymorphism in rice germplasms under drought stress. *J Genet Genomics.* **41**, 609-12 (2014).
8. Gao, F. *et al.* OsNAC52 , a rice NAC transcription factor, potentially responds to ABA and confers drought tolerance in transgenic plants. *Plant Cell Tissue Organ Cult.* **100**, 255-62 (2009).
9. Takasaki, H. *et al.* SNAC-As, stress-responsive NAC transcription factors, mediate ABA-inducible leaf senescence. *Plant J Cell Mol Biol.* **84**, 1114-23 (2015).

10. Christianson, J.A. & Dennis, E.S. The low-oxygen-induced NAC domain transcription factor ANAC102 affects viability of *Arabidopsis* seeds following low-oxygen treatment. *Plant Physiol.* **149**, 1724-38 (2009).
11. Nakashima, K. *et al.* Functional analysis of a NAC-type transcription factor OsNAC6 involved in abiotic and biotic stress-responsive gene expression in rice. *Plant J.* **51**, 617-30 (2007).
12. Hu, H.H. *et al.* Characterization of transcription factor gene SNAC2 conferring cold and salt tolerance in rice. *Plant Mol Biol.* **67**, 169-81 (2008).
13. Sun, L. *et al.* Functions of rice NAC transcriptional factors, ONAC122 and ONAC131, in defense responses against *Magnaporthe grisea*. *Plant Mol Biol.* **81**, 41-56 (2013).
14. Jin, S.J. *et al.* Root-specific expression of OsNAC10 improves drought tolerance and grain yield in rice under field drought conditions. *Plant Physiol.* **153**, 185-97 (2010).
15. Nuruzzaman, M. *et al.* Comprehensive gene expression analysis of the NAC gene family under normal growth conditions, hormone treatment, and drought stress conditions in rice using near-isogenic lines (NILs) generated from crossing Aday Selection (drought tolerant) and IR64. *Mol Genet Genomics.* **287**, 389-410 (2012).
16. Kato, H., Motomura, T., Komeda, Y., Saito, T. & Kato, A. Overexpression of the NAC transcription factor family gene ANAC036 results in a dwarf phenotype in *Arabidopsis thaliana*. *J Plant Physiol.* **167**, 571-7 (2010).
17. Yokotani, N. *et al.* Tolerance to various environmental stresses conferred by the salt-responsive rice gene ONAC063 in transgenic *Arabidopsis*. *Planta.* **229**, 1065-75 (2009).
18. Yang, Z.T. *et al.* A plasma membrane-tethered transcription factor, NAC062/ANAC062/NTL6, mediates the unfolded protein response in *Arabidopsis*. *Plant J Cell Mol Biol.* **79**, 1033-43 (2014).
19. Van Aken, O., Ford, E., Lister, R., Huang, S. & Millar, A.H. Retrograde signalling caused by heritable mitochondrial dysfunction is partially mediated by ANAC017 and improves plant performance. *Plant J.* doi: 10.1111/tbj.13276 (2016).
20. Clercq, I.D. *et al.* The membrane-bound NAC transcription factor ANAC013 functions in mitochondrial retrograde regulation of the oxidative stress response in *Arabidopsis*. *Plant Cell.* **25**, 3472-90 (2013).
21. Fujiwara, S. & Mitsuda, N. ANAC075, a putative regulator of VASCULAR-RELATED NAC-DOMAIN7, is a repressor of flowering. *Plant Biotechnol.* doi: 10.5511/plantbiotechnology.16.0215b (2016).
22. Saga, H. *et al.* Identification and characterization of ANAC042, a transcription factor family gene involved in the regulation of camalexin biosynthesis in *Arabidopsis*. *Mol Plant Microbe Interact.* **25**, 684-96 (2012).
23. †, X.J.H. *et al.* AtNAC2, a transcription factor downstream of ethylene and auxin signaling pathways, is involved in salt stress response and lateral root development. *Plant J.* **44**, 903-16 (2006).
24. Bu, Q.Y. *et al.* Role of the *Arabidopsis thaliana* NAC transcription factors ANAC019 and ANAC055 in regulating jasmonic acid-signaled defense responses. *Cell Res.* **18**, 756-67 (2008).
25. Jensen, M.K. *et al.* The *Arabidopsis thaliana* NAC transcription factor family: structure-function relationships and determinants of ANAC019 stress signalling. *Biochem J.* **426**, 183-96 (2009).



**Table S2** Diversifying and purifying selection of PvNACs.

|             | <b>Chromosomal locations</b> | <b>Ks</b> | <b>Ka</b> | <b>Ka/Ks</b> | <b>Evolutionary Selection</b> | <b>Duplication type</b> |
|-------------|------------------------------|-----------|-----------|--------------|-------------------------------|-------------------------|
| PvNAC1/21   | Chr01b/01a                   | 0.670     | 0.638     | 0.953        | Purifying                     | Homeologous             |
| PvNAC4/20   | Chr01b/01a                   | 0.067     | 0.015     | 0.220        | Purifying                     | Homeologous             |
| PvNAC5/17   | Chr01a/01b                   | 2.008     | 1.767     | 0.880        | Purifying                     | Homeologous             |
| PvNAC7/18   | Chr01b/01a                   | 0.447     | 0.636     | 1.423        | Diversifying                  | Homeologous             |
| PvNAC8/16   | Chr01a/01b                   | 0.125     | 0.044     | 0.348        | Purifying                     | Homeologous             |
| PvNAC11/12  | Chr01b/01a                   | 0.432     | 0.485     | 1.122        | Diversifying                  | Homeologous             |
| PvNAC13/14  | Chr01b/01b                   | 1.223     | 6.145     | 5.025        | Diversifying                  | Homeologous             |
| PvNAC22/45  | Chr02a/02b                   | 0.963     | 3.567     | 3.705        | Diversifying                  | Homeologous             |
| PvNAC24/44  | Chr02a/02b                   | 0.907     | 2.686     | 2.962        | Diversifying                  | Homeologous             |
| PvNAC25/43  | Chr02a/02b                   | 0.059     | 0.012     | 0.202        | Purifying                     | Homeologous             |
| PvNAC28/41  | Chr02b/02a                   | 1.328     | 1.261     | 0.950        | Purifying                     | Homeologous             |
| PvNAC29/42  | Chr02a/02b                   | 0.861     | 2.003     | 2.325        | Diversifying                  | Homeologous             |
| PvNAC30/40  | Chr02b/02a                   | 1.175     | 2.559     | 2.177        | Diversifying                  | Homeologous             |
| PvNAC31/39  | Chr02a/02b                   | 1.701     | 0.000     | 0.000        | Purifying                     | Homeologous             |
| PvNAC32/35  | Chr02a/02b                   | 0.560     | 4.367     | 7.802        | Diversifying                  | Homeologous             |
| PvNAC33/34  | Chr02a/02b                   | 1.169     | 3.506     | 3.000        | Diversifying                  | Homeologous             |
| PvNAC36/71  | Chr02b/04b                   | 1.206     | 3.413     | 2.830        | Diversifying                  | Paralogous              |
| PvNAC49/56  | Chr03b/03a                   | 0.389     | 0.624     | 1.604        | Diversifying                  | Homeologous             |
| PvNAC50/54  | Chr03a/03b                   | 1.177     | 2.660     | 2.260        | Diversifying                  | Homeologous             |
| PvNAC59/133 | Chr08a/03b                   | 0.590     | 0.969     | 1.641        | Diversifying                  | Paralogous              |
| PvNAC61/70  | Chr04b/04a                   | 0.568     | 0.626     | 1.102        | Diversifying                  | Homeologous             |
| PvNAC64/67  | Chr04a/04b                   | 2.120     | 2.356     | 1.111        | Diversifying                  | Homeologous             |
| PvNAC74/86  | Chr05a/05b                   | 4.431     | 2.835     | 0.640        | Purifying                     | Homeologous             |
| PvNAC76/88  | Chr05b/05a                   | 0.457     | 0.317     | 0.692        | Purifying                     | Homeologous             |

|              |               |       |       |       |              |             |
|--------------|---------------|-------|-------|-------|--------------|-------------|
| PvNAC77/90   | Chr05a/05b    | 0.738 | 1.819 | 2.466 | Diversifying | Homeologous |
| PvNAC78/91   | Chr05b/05a    | 0.934 | 2.520 | 2.699 | Diversifying | Homeologous |
| PvNAC79/92   | Chr05a/05b    | 0.552 | 1.843 | 3.338 | Diversifying | Homeologous |
| PvNAC82/93   | Chr05b/05a    | 0.360 | 0.611 | 1.698 | Diversifying | Homeologous |
| PvNAC83/94   | Chr05b/05a    | 0.687 | 1.396 | 2.033 | Diversifying | Homeologous |
| PvNAC95/110  | Chr06b/06a    | 0.850 | 1.913 | 2.250 | Diversifying | Homeologous |
| PvNAC96/107  | Chr06a/06b    | 0.788 | 0.000 | 0.000 | Purifying    | Homeologous |
| PvNAC97/108  | Chr06b/06a    | 0.817 | 3.836 | 4.695 | Diversifying | Homeologous |
| PvNAC99/102  | Chr06b/06a    | 0.711 | 0.699 | 0.983 | Purifying    | Homeologous |
| PvNAC100/103 | Chr06b/06a    | 1.100 | 3.028 | 2.754 | Diversifying | Homeologous |
| PvNAC111/118 | Chr07a/07b    | 0.393 | 0.468 | 1.190 | Diversifying | Homeologous |
| PvNAC113/119 | Chr07a/07b    | 0.427 | 0.656 | 1.536 | Diversifying | Homeologous |
| PvNAC114/124 | Chr07a/07b    | 0.121 | 0.092 | 0.757 | Purifying    | Homeologous |
| PvNAC121/122 | Chr07b/07b    | 0.437 | 0.927 | 2.122 | Diversifying | Homeologous |
| PvNAC128/136 | Chr08b/08a    | 2.518 | 2.700 | 1.072 | Diversifying | Homeologous |
| PvNAC129/138 | Chr08a/08b    | 0.328 | 0.259 | 0.792 | Purifying    | Homeologous |
| PvNAC130/137 | Chr08b/08a    | 1.179 | 1.257 | 1.067 | Diversifying | Homeologous |
| PvNAC142/161 | Chr09b/09a    | 0.880 | 1.876 | 2.132 | Diversifying | Homeologous |
| PvNAC144/159 | Chr09b/09a    | 3.002 | 3.384 | 1.127 | Diversifying | Homeologous |
| PvNAC145/158 | Chr09b/09a    | 0.473 | 0.809 | 1.709 | Diversifying | Homeologous |
| PvNAC146/156 | Chr09b/09a    | 1.075 | 2.353 | 2.189 | Diversifying | Homeologous |
| PvNAC147/155 | Chr09a/09b    | 0.298 | 0.389 | 1.307 | Diversifying | Homeologous |
| PvNAC148/157 | Chr09a/09b    | 0.564 | 0.862 | 1.529 | Diversifying | Homeologous |
| PvNAC150/151 | Chr09a/09b    | 0.577 | 0.499 | 0.864 | Purifying    | Homeologous |
| PvNAC24/25   | Chr02a/Chr02a | 2.632 | 3.792 | 1.440 | Diversifying | Tandem      |
| PvNAC43/44   | Chr02b/Chr02b | 2.069 | 0.685 | 0.331 | Purifying    | Tandem      |

|              |               |       |       |       |              |        |
|--------------|---------------|-------|-------|-------|--------------|--------|
| PvNAC54/55   | Chr03b/Chr03b | 2.262 | 2.723 | 1.203 | Diversifying | Tandem |
| PvNAC105/106 | Chr06b/Chr06b | 2.632 | 3.792 | 1.440 | Diversifying | Tandem |

---

**Table S3** Local blast between NAC genes of Shen's study (2009) and our study.

|    | NAC genes in Shen's study | NAC genes in our study |
|----|---------------------------|------------------------|
| 1  | PvNAC032                  | PvNAC89                |
| 2  | PvNAC055                  | PvNAC190               |
| 3  | PvNAC033                  | PvNAC183               |
| 4  | PvNAC046                  | PvNAC16                |
| 5  | PvNAC061                  | PvNAC215               |
| 6  | PvNAC062                  | PvNAC215               |
| 7  | PvNAC066                  | PvNAC85                |
| 8  | PvNAC068                  | PvNAC152               |
| 9  | PvNAC101                  | PvNAC213               |
| 10 | PvNAC102                  | PvNAC16                |

**Reference**

Shen, H., Yin, Y.B., Chen, F., Xu, Y. & Dixon, R.A. A Bioinformatic analysis of NAC genes for plant cell wall development in relation to lignocellulosic bioenergy production. *Bioenerg Res.* **2**, 217-32 (2009).

**Table S4** The interaction relationship for PvNAC proteins and their orthologous rice NAC proteins.

| Node 1 PvNACs | Node 1 rice NAC proteins | Node 2 PvNACs | Node 2 rice NAC proteins | Score |
|---------------|--------------------------|---------------|--------------------------|-------|
| PvNAC92       | LOC_Os01g60020.1         | PvNAC32       | LOC_Os07g12340.1         | 0.606 |
| PvNAC141      | LOC_Os03g60080.1         | PvNAC92       | LOC_Os01g60020.1         | 0.687 |
| PvNAC62       | LOC_Os06g33940.1         | PvNAC56       | LOC_Os12g29330.1         | 0.414 |
| PvNAC245      | LOC_Os06g46270.1         | PvNAC56       | LOC_Os12g29330.1         | 0.725 |
| PvNAC238      | LOC_Os12g41680.1         | PvNAC56       | LOC_Os12g29330.1         | 0.479 |
| PvNAC175      | LOC_Os05g48850.1         | PvNAC213      | LOC_Os08g02300.1         | 0.582 |
| PvNAC89       | LOC_Os01g48130.2         | PvNAC175      | LOC_Os05g48850.1         | 0.601 |
| PvNAC46       | LOC_Os07g48450.1         | PvNAC147      | LOC_Os03g21060.1         | 0.814 |
| PvNAC239      | LOC_Os02g12310.1         | PvNAC31       | LOC_Os01g29840.1         | 0.582 |
| PvNAC80       | LOC_Os01g66120.1         | PvNAC141      | LOC_Os03g60080.1         | 0.767 |
| PvNAC32       | LOC_Os07g12340.1         | PvNAC141      | LOC_Os03g60080.1         | 0.678 |

**Table S5** The primers of genes used to be validated.

| Gene     | Forward primer          | Reverse primer           | Amplification efficiency (%) |                       |
|----------|-------------------------|--------------------------|------------------------------|-----------------------|
| PvNAC41  | CTATCTCAAGCGAAAGATTCAGC | ATATGGGCCTATCTGTTTCCTGTT | 95.63                        |                       |
| PvNAC141 | AGTCGGAGATCGTGGACAAC    | GAAGAGCGACGAGTAGAAGTCCT  | 92.15                        |                       |
| PvNAC174 | GTACGGCGAGAAGGAGTGGTACT | GTACTCGTGCATGATCCAGTTG   | 95.74                        |                       |
| PvNAC185 | AACCTGAACCACCGCTAA      | ACTGCTGCTACCATCAA        | 97.43                        |                       |
| PvNAC208 | TCTCCTCAACACCATCGACTACT | CATAGTCATCACTCGCTTCCTCT  | 98.22                        |                       |
| PvNAC216 | AGTTTCTGAACCCTAGCTTCGAC | CTTGAAGATCTCCCTGTCCTTG   | 88.39                        | Stress-related genes  |
| PvNAC219 | GCTTCTTCATTCTTGTCGATCTC | GACATCATCATCTCCATCTCCAT  | 91.28                        |                       |
| PvNAC239 | GGAGGAGGAATCAATCAAGAAAG | AGGGGTGCGAACTTGTAGAGGTC  | 89.90                        |                       |
| PvNAC249 | CAACAAACAACAGTGGCAGTTAC | TCACCGTAGTTGTTGCCTAACTT  | 93.68                        |                       |
| PvNAC65  | CCTCTGCACCGTTCGTCAC     | GTAGCCTTCCGTTGTCCTTCTC   | 102.87                       |                       |
| PvNAC103 | AGGAGGACTGGGTGCTATGC    | CAGTGTTGGTGTCTGTGAGGG    | 98.88                        |                       |
| PvNAC224 | TGGAAGCCAAGCAGGAAGC     | CGCCAAGGGAGACAAGAAA      | 96.58                        |                       |
| PvNAC64  | ACAATCTGGAGCATAACC      | GAATCACCATCCCACAAC       | 90.33                        |                       |
| PvNAC87  | AAGGATGGCTACTGGAAG      | AAGGAGGTTGAACTGGATG      | 88.67                        |                       |
| PvNAC239 | GGAGGAGGAATCAATCAAGAAAG | AGGGGTGCGAACTTGTAGAGGTC  | 91.20                        | Tissue-specific genes |
| PvNAC85  | ATGTGCCAGCAATCCTTC      | GGCGGCCAGTATGGGTAA       | 97.28                        |                       |
| PvNAC190 | CAGCAGCAAGCACCACCAGG    | CCGATCCAGCGTGTCCCAGT     | 90.89                        |                       |
| PvNAC100 | GCAGAACAACCAACCCAAAG    | AGAAGGTCACCAAGGCTCACT    | 91.93                        |                       |
| UCE2     | TATATGACGGAGGCTACT      | CAGGTGGATGAAGAATAGA      | 95.34                        | Reference gene        |
